# Supplementary material for: α-Synuclein Immunotherapy Blocks Uptake and Templated Propagation of Misfolded α-Synuclein and Neurodegeneration
Source: PubMed Central journal article supplement — Cell Rep. Author manuscript; Available in PMC 2015 Apr 27. (PMC4410967; doi:10.1016/j.celrep.2014.05.033), 2014-06-12

# Figure S1 Related to Figure 1

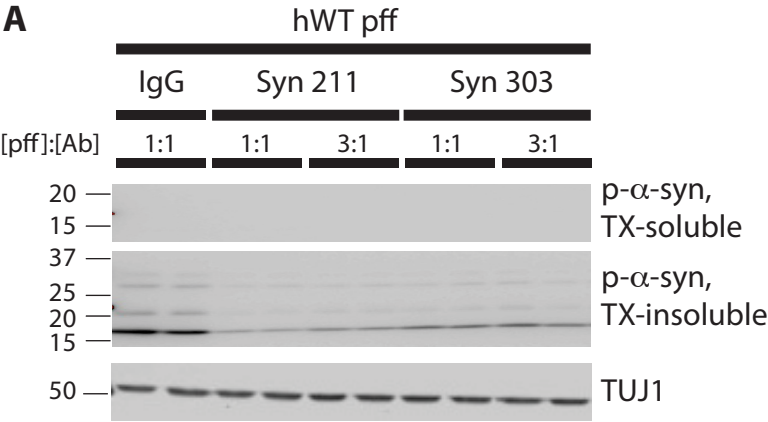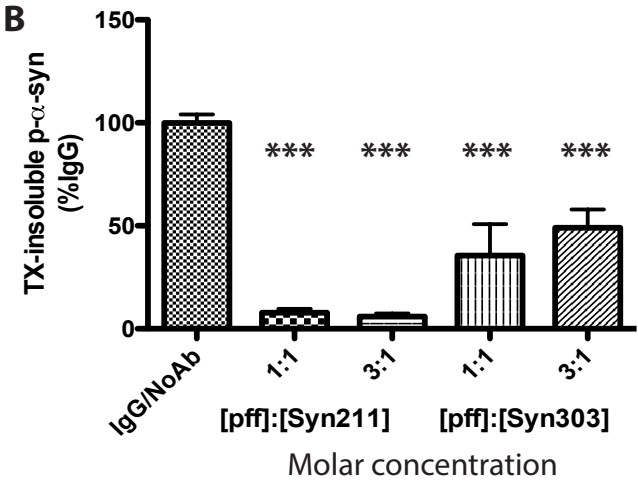

# Figure S2 Related to Figure 4

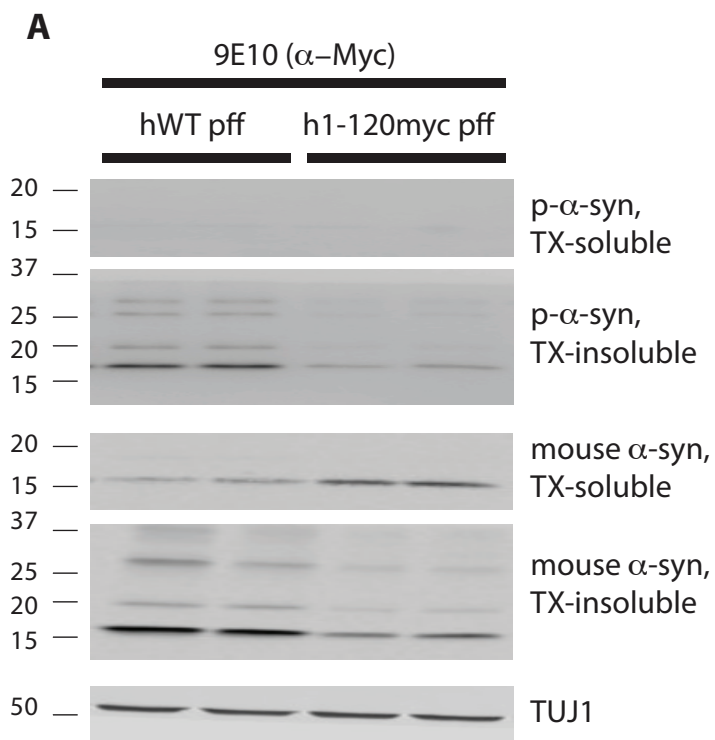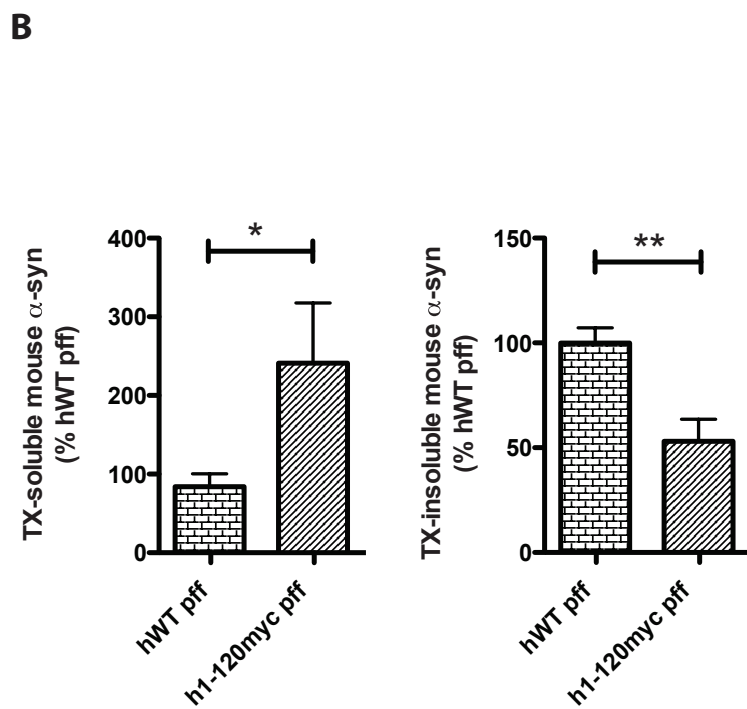

# Figure S3 Related to Figure 5

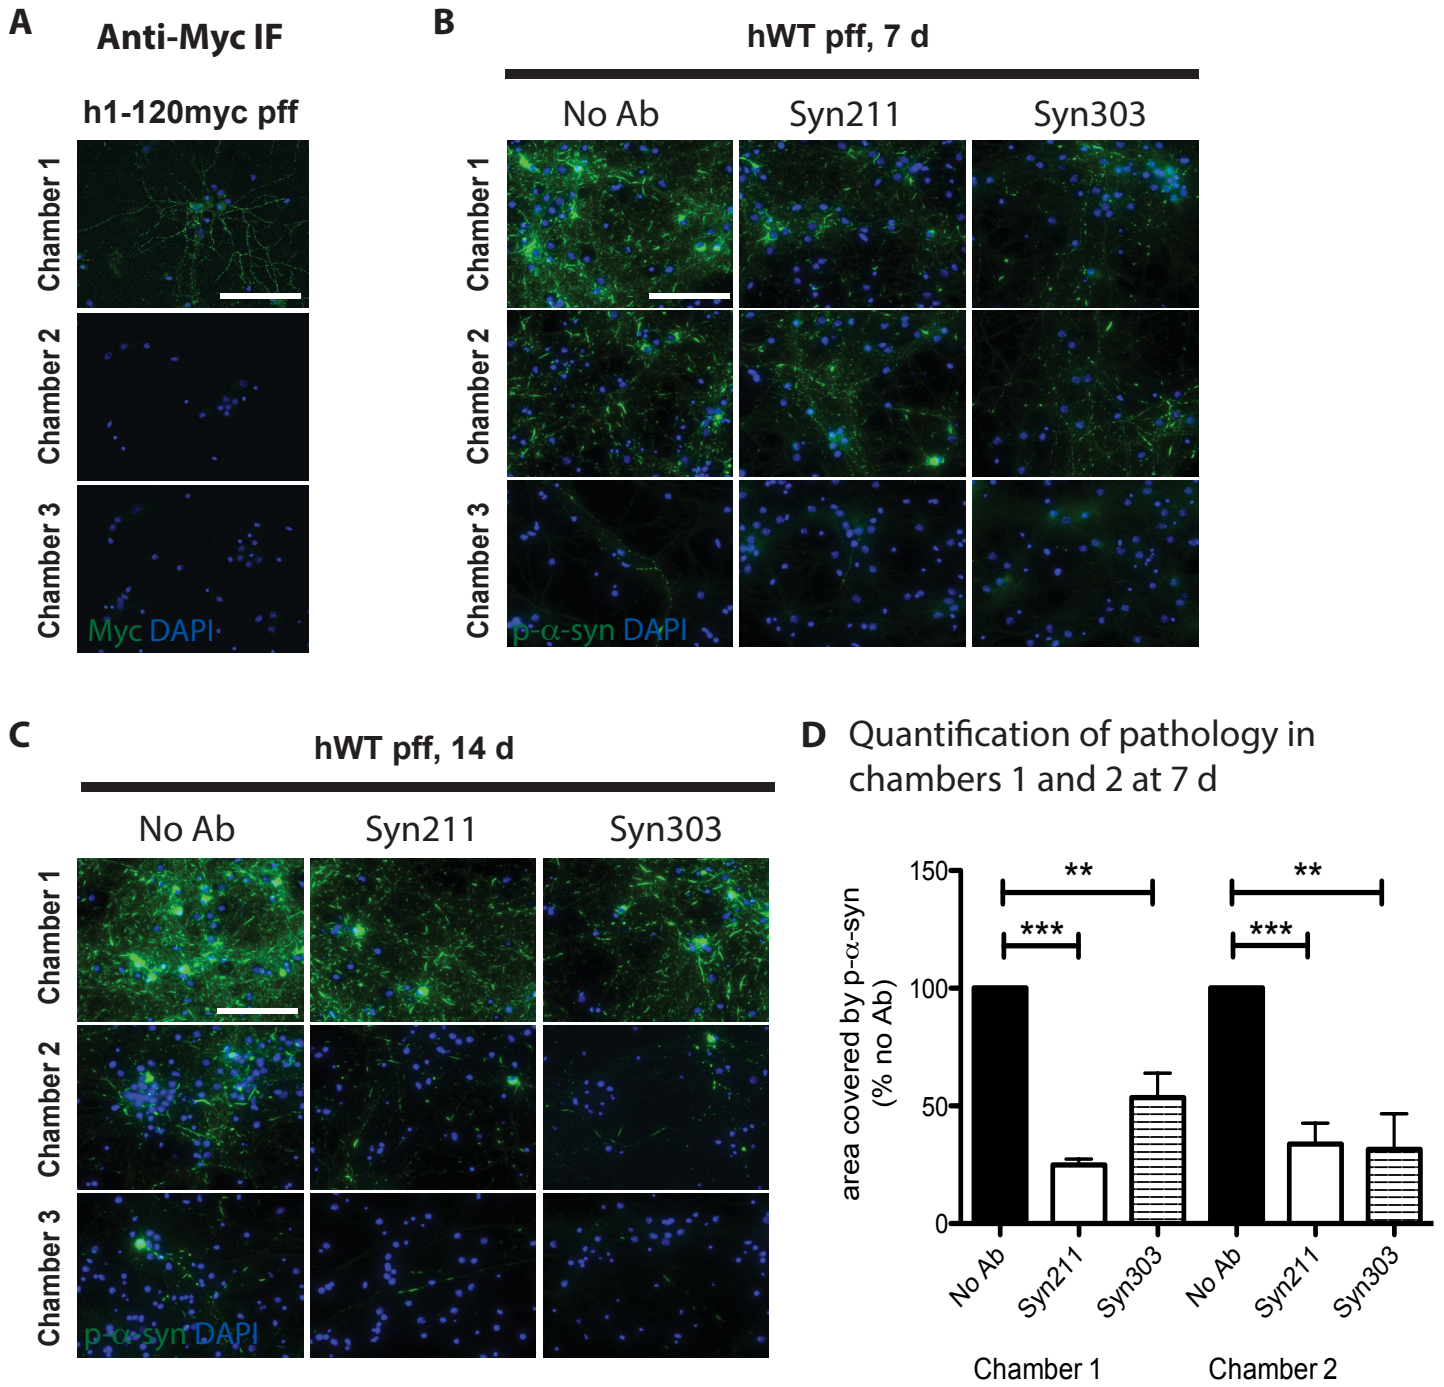

**Figure S4 Related to Figure 6**

**A Plasma**

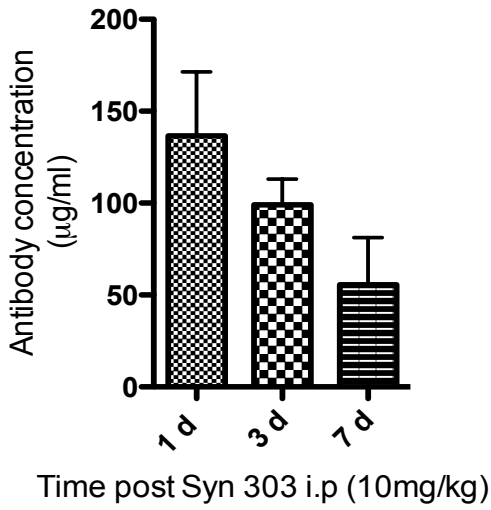

**B CSF**

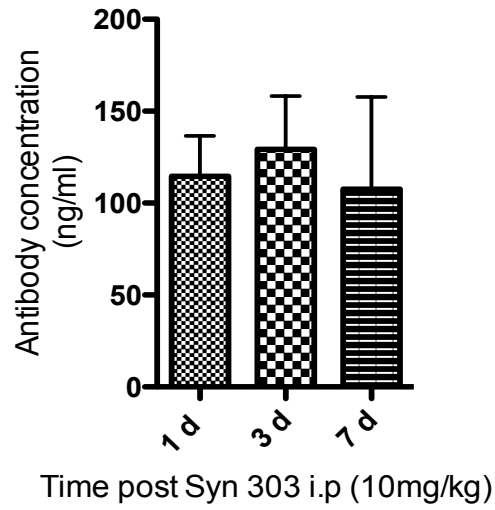

**C CSF:Plasma**

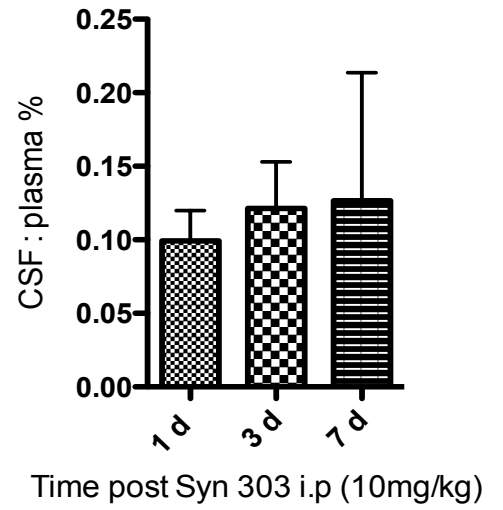

## Figure S5 Related to Figure 7

**A** Ipsilateral cortex

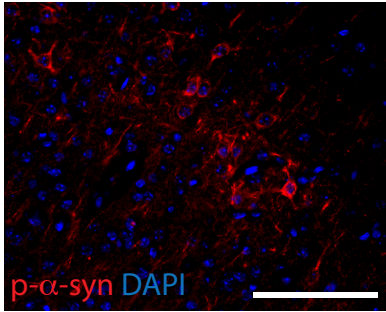

**B** Ipsilateral SN

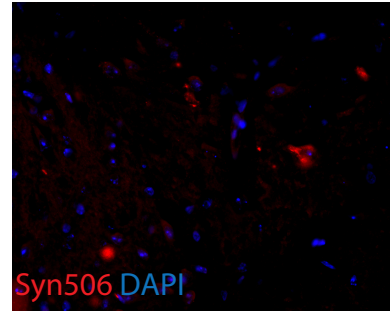

# Figure S6 Related to Figure 7

## A Schematic of experiment

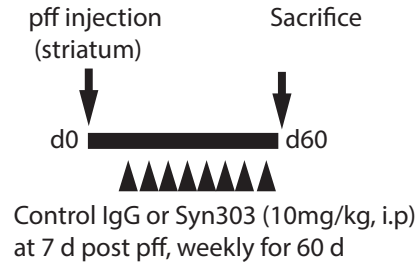

## B SNpc

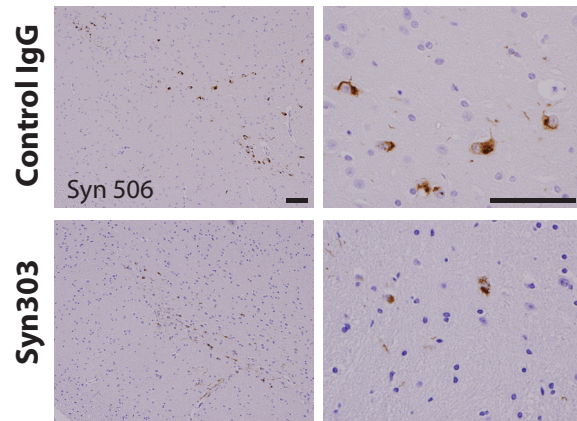

## C

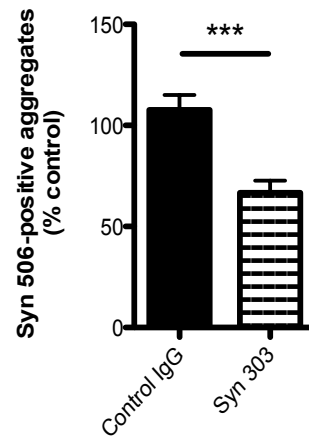

## D Ipsilateral amygdala

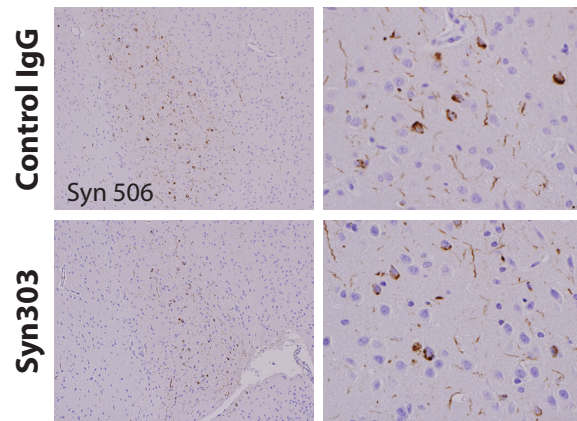

## E

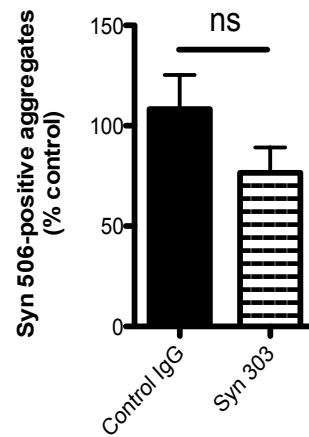

## F Contralateral amygdala

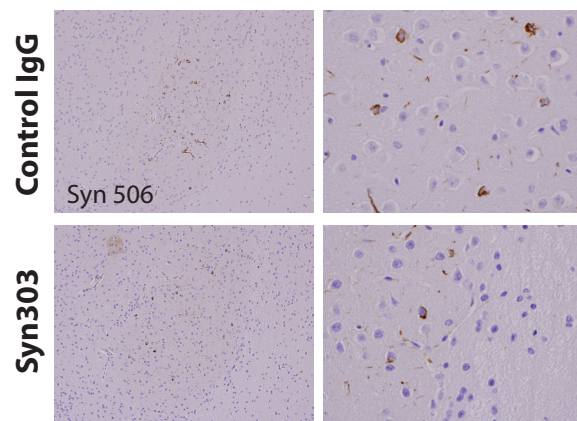

## G

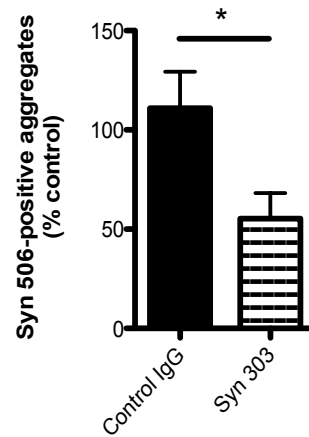

# Figure S7 Related to Figure 7

## A Rotarod

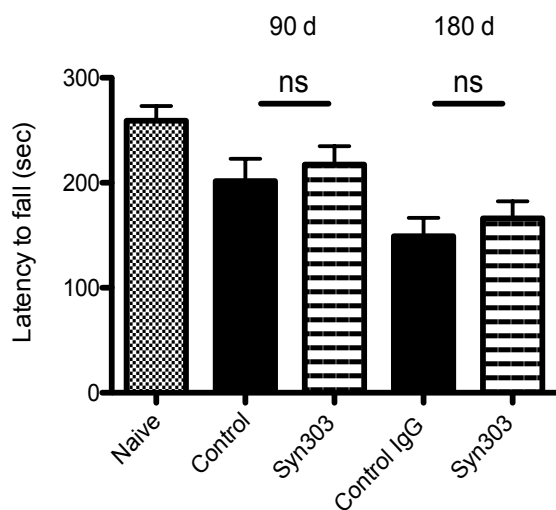

## B Ipsilateral SN

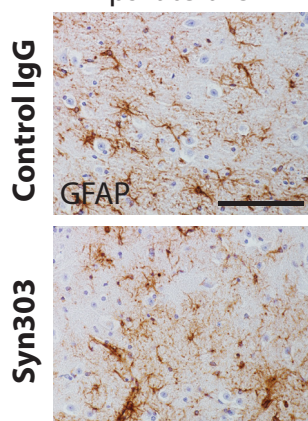

## C

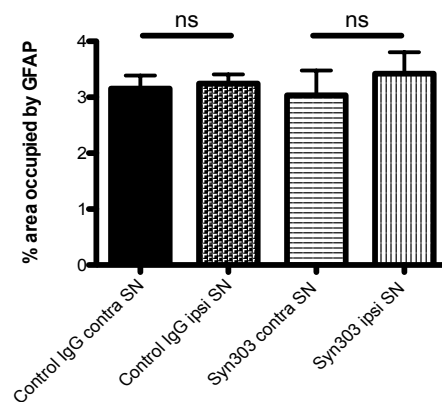

## D Ipsilateral SN

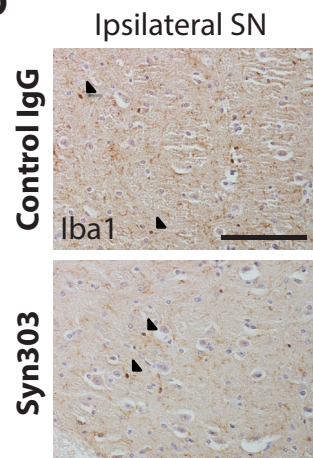

## E

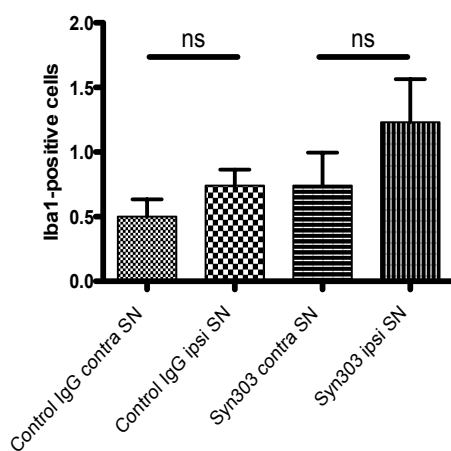

Supplement: NIHMS678016-supplement-Tran_fig_.pdf [file NIHMS678016-supplement-Tran_fig_.pdf]
